# Supplementary material for: Plant-based default nudges effectively increase the sustainability of catered meals on college campuses: Three randomized controlled trials
Source: Frontiers journal article supplement (doi:10.3389/fsufs.2022.1001157), 2022-11-09
Supplement: Data_Sheet_1.docx [file Data_Sheet_1.docx]

***Supplementary Materials***

## RSVP Surveys

**UCLA-CEE (individual meal)**

**Default: Meat**

**
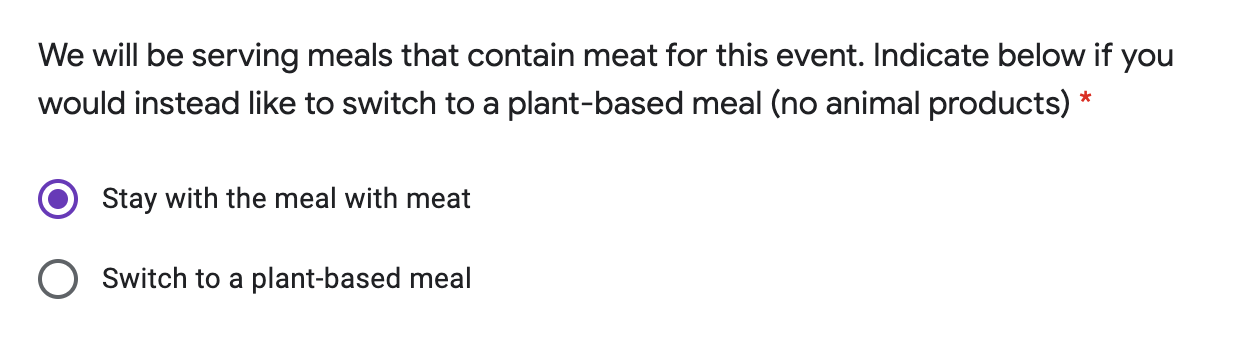
**

**Default: Plant-based**

**
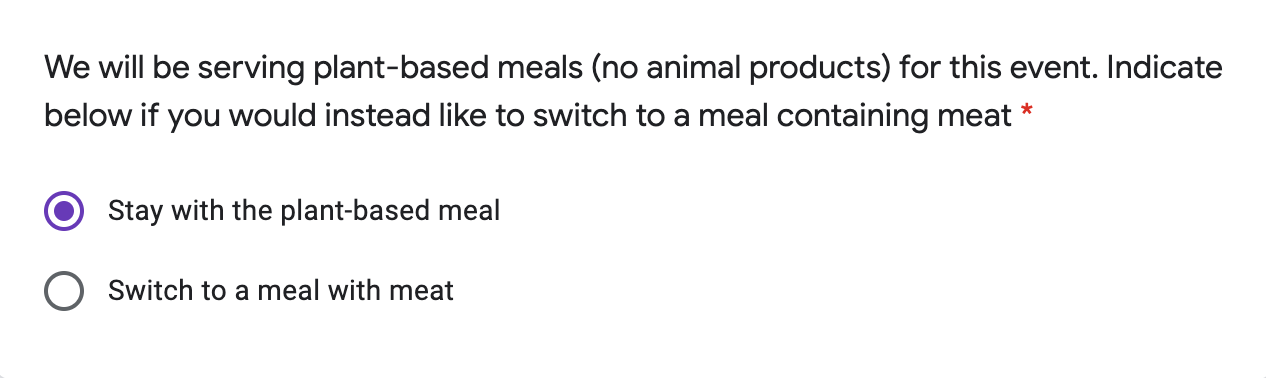
**

**UCLA-DG (buffet)**

Default: Meat

**
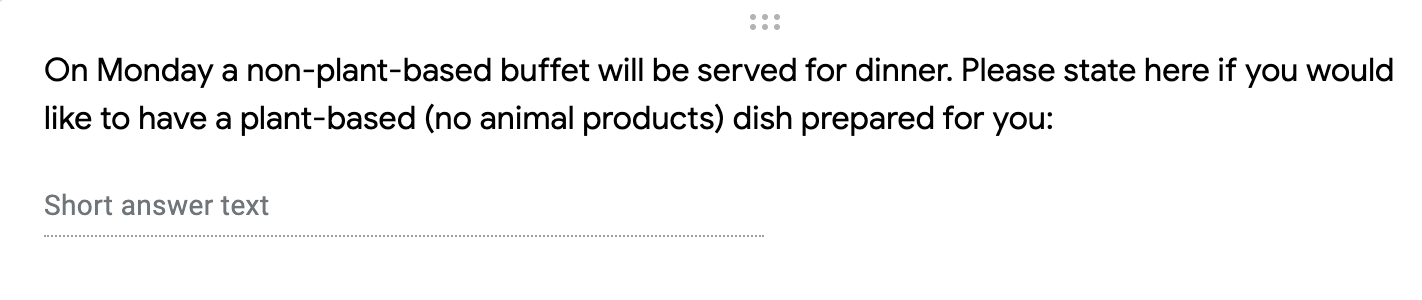
**

Default: Plant-based

**
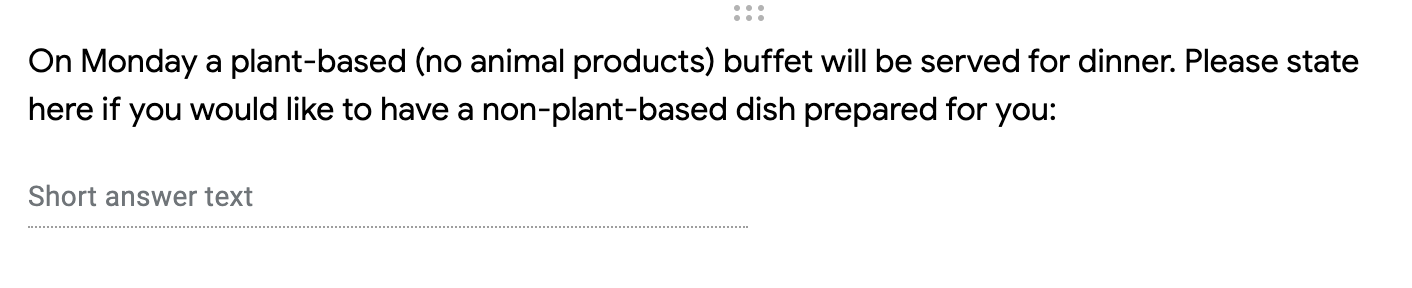
**

**Harvard-BIH (individual meal)**

Default: Meat
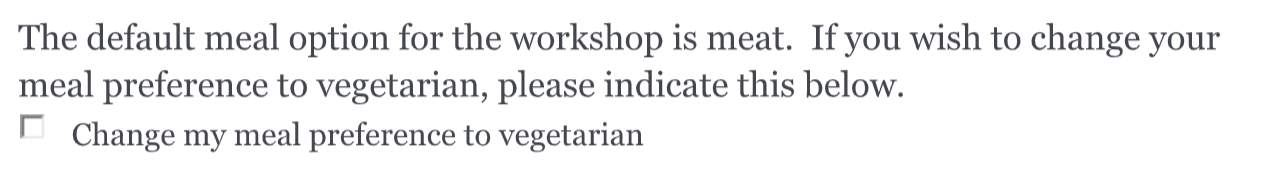


Default: Plant-based


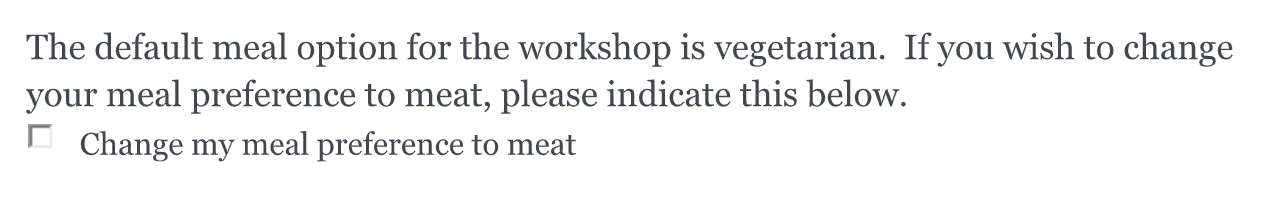


## Recipe for Each Meal Option

**Vegan Patty Sandwich (tofu)**

Bean & Tofu Patty (1/2 cup beans)

Bean & Tofu Patty (1/4 cup tofu)

Avocado (~3/4 of one)

Tomatoes chopped (1/4 cup)

Lettuce (calculated 10 inner leaves)

Bell Peppers, tricolor (1 bell pepper = 130g) (half of one)

Mushrooms (1/4 cup cooked)

Bread (2 slices)

**Vegetarian Caprese Sandwich (cheese)**

Mozzarella Cheese (2.5 oz)

Bread (2 slices)

Tomato slices (1 med)

Romaine lettuce (16 inner leaves)

Olive Oil (1 T)

Basil (1/5 cup) - (no planetary boundary information)

Mushrooms (1/4 cup)

Onion (half of a small one - 35g)

**Chicken-Bacon Sandwich**

Chicken Breast (3.5 oz)

Onion (1/4 of a small one)

Mozzarella Cheese (1/2 oz)

Bread (2 slices)

Lettuce (half cup shredded)

Tomato (half of one)

Bacon (1.5 slices)

Olive Oil (1/4 T)

**Beef Sandwich**

Beef (3 oz)

Cheese (1 slice)

Bread (2 slices)

Tomato (half of one)

Onion (half of a small one - 35g)

Avocado (1/2)

Lettuce (half cup shredded)

Olive Oil (1/8 T)

## Environmental Footprint and Sources for each ingredient (based on data in supplementary table of Whitener et al, 2019)

| Food |  | Greenhouse Gases | |  | Land Use | |  | Nitrogen | |  | Phosphorus | |
| --- | --- | --- | --- | --- | --- | --- | --- | --- | --- | --- | --- | --- |
|  |  | g CO2 eq/g | Ref. |  | m2/g | Ref. |  | mg/g | Ref |  | mg/g | Ref |
| Temperate fruits |  | 0.34 | H&K |  | 6.70E-04 | CFPC--NA |  | 12.7 | Spr |  | 1.91 | Spr |
| Tropical fruits |  | 0.86 | H&K |  | 1.05E-03 | CFPC--NA |  | 10.2 | Spr |  | 1.58 | Spr |
| Vegetables |  | 0.816 | H&K |  | 8.10E-04 | CFPC--NA |  | 9.55 | Spr |  | 1.67 | Spr |
| Legumes |  | 0.73 | H&K, Clune |  | 4.04E-03 | CFPC--NA |  | 0 | Spr |  | 0 | Spr |
| Corn |  | 0.66 | H&K |  | 1.74E-03 | CFPC--NA |  | 22.7 | Spr |  | 3.57 | Spr |
| Wheat |  | 0.53 | H&K |  | 4.89E-03 | CFPC--NA |  | 13.9 | Spr |  | 4.39 | Spr |
| Rice |  | 1.14 | H&K |  | 2.17E-03 | CFPC--NA |  | 9.4 | Spr |  | 5.2 | Spr |
| Potatoes |  | 0.21 | H&K |  | 5.20E-04 | CFPC--NA |  | 3.63 | Spr |  | 0.71 | Spr |
| Oil |  | 1.63 | H&K |  | 1.31E-02 | CFPC--NA |  | 31.3 | Spr |  | 5.61 | Spr |
| Other grains |  | 0.48 | H&K |  | 4.50E-03 | CFPC--NA |  | 16.3 | Spr |  | 2.71 | Spr |
| Eggs |  | 3.54 | H&K |  | 6.84E-03 | CFPC--NA |  | 51.22 | Spr |  | 8.81 | Spr |
| Butter |  | 11.92 | H&K |  | 1.40E-02 | CFPC--NA |  | 82.5 | M&C |  | 70 | M&C |
| Milk |  | 1.34 | H&K |  | 2.05E-03 | CFPC--NA |  | 20.4 | Leach |  | 1.58 | Spr |
| Low fat dairy yogurt |  | 2.02 | H&K |  | 2.26E-03 | CFPC--NA |  | 9.7 | M&C |  | 8.2 | M&C |
| Cheese |  | 9.78 | H&K |  | 1.05E-04 | CFPC--NA |  | 127.1 | Leach |  | 33.5 | M&C |
| Soy milk |  | 0.7 | M&C |  | 7.80E-04 | CFPC--NA |  | 0.2 | M&C |  | 1.3 | M&C |
| Almond milk |  | 0.7 | M&C |  | 5.00E-04 | CFPC--NA |  | 0.2 | M&C |  | 1.3 | M&C |
| Other vegan milk |  | 0.7 | M&C |  | 5.20E-04 | CFPC--NA |  | 0.2 | M&C |  | 1.3 | M&C |
| Ice Cream |  | 3.1 | H&K |  | 3.69E-03 | CFPC--NA |  | 39.4 | M&C |  | 33.5 | M&C |
| Frozen Yogurt |  | 3.1 | H&K |  | 2.26E-03 | CFPC--NA |  | 9.7 | M&C |  | 8.2 | M&C |
| Fish from aquaculture |  | 3.83 | H&K |  | 4.94E-03 | CFPC--NA |  | 80.1 | Leach |  | 4.4 | M&C |
| Fish from trawling |  | 3.83 | H&K |  | 0.00E+00 | CFPC--NA |  | 80.1 | Leach |  | 4.4 | M&C |
| Ruminant meat |  | 40.2 | Har |  | 1.35E-01 | CFPC--NA |  | 234 | Leach |  | 97.9 | M&C |
| Pork and bacon |  | 6.87 | Leach |  | 2.10E-02 | CFPC--NA |  | 126 | Leach |  | 22.2 | M&C |
| Poultry |  | 5.05 | Leach |  | 1.15E-02 | CFPC--NA |  | 89.8 | Leach |  | 16 | M&C |
| Soy-based meat alternative |  | 1.5 | Nij |  | 4.14E-03 | CFPC--NA |  | 2.75 | Spr |  | 3.7 | M&C |
| Sugar |  | 0.96 | M&C, Spr |  | 2.39E-03 | CFPC--NA |  | 1.5 | M&C |  | 3.6 | M&C |
| Peanuts |  | 1.94 | H&K |  | 7.28E-03 | CFPC--NA |  | 0 | Spr |  | 8 | M&C |
| Almonds |  | 1.17 | H&K |  | 6.92E-03 | CFPC--NA |  | 14.2 | Spr |  | 12.6 | M&C |
| Walnuts |  | 1.17 | H&K |  | 6.92E-03 | CFPC--NA |  | 14.2 | Spr |  | 12.6 | M&C |
| Seeds |  | 0.8 | H&K |  | 6.92E-03 | CFPC--NA |  | 14.2 | Spr |  | 12.6 | M&C |
| Quinoa |  | 0.8 | H&K |  | 6.92E-03 | CFPC--NA |  | 14.2 | Spr |  | 12.6 | M&C |

**References**

1. Clune, S., Crossin, E., Verghese, K.~~,~~  (2017). Systematic Review of Greenhouse Gas Emissions for Different Fresh Food Categories, *Journal of Cleaner Production*, 140, 766-783. doi: 10.1016/j.jclepro.2016.04.082.
2. Heller, M.C., Keoleian, G.A. (2014). Greenhouse Gas Emission Estimates of U.S. Dietary Choices And Food Loss. *J.Ind. Ecol,* 291-401. Doi: 10.1111/jiec.12174
3. Leach, A.M, Emery, K. A., Gephart, J., et al. (2016). Environmental impact food labels combining carbon, nitrogen, and water footprints. *Food Policy*, 61, 213–223. doi:10.1016/j.foodpol.2016.03.006.
4. Meier, T., Christen, O.~~,~~ (2013). Environmental Impacts of Dietary Recommendations and Dietary Styles: Germany As an Example~~.~~, *Environ. Sci. Technol.,* 2013, 47, 2, 877–888. doi:10.1021/es302152v.
5. Nijdam, D., Rood, T., Westhoek, H. (2012). The Price of Protein: Review of Land Use and Carbon Footprints from Life Cycle Assessments of Animal Food Products and Their Substitutes, *Food Policy*, 37, 760–770.  doi:10.1016/j.foodpol.2012.08.002.
6. Waite, R., Vennard, D., and Pozzi, G. (2019). Tracking Progress Toward the Cool Food Pledge: Setting Climate Targets, Tracking Metrics, Using the Cool Food Calculator, and Related Guidance for Pledge Signatories. Technical Food Calculator, and Related Guidance for Pledge Signatories. Technical Food Calculator, and Related Guidance for Pledge Signatories. Technical Note. *Washington, DC: World Resources Institute.* Retrieved from [www.coolfoodpledge.org](http://www.coolfoodpledge.org) [Accessed March 1, 2022].
7. Whitener, V.A., Cook, B., Spielbauer, I., et al. (2021). Impact of a College Course on the Sustainability of Student Diets in Terms of the Planetary Boundaries for Climate Change and Land, Water, Nitrogen and Phosphorus Use. *Frontiers in Sustainable Food Systems,* 5~~:~~,677002~~.~~. doi: 10.3389/fsufs.2021.677002
